# Supplementary material for: A hydrophilic covalent organic framework for photocatalytic oxidation of benzylamine in water
Source: Royal Society of Chemistry journal article supplement (doi:10.1039/c9cc07661a), 2019-12-10
Supplement: c9cc07661a1.pdf [file c9cc07661a1.pdf]

## Electronic Supporting Information

### **A hydrophilic covalent organic framework for photocatalytic oxidation of benzylamine in water**

Ziqian Liu, Qing Su,\* Pengyao Ju, Xiaodong Li, Guanghua Li, Qiaolin Wu,\* and Bing Yang\*

## CONTENTS

|                                               |          |
|-----------------------------------------------|----------|
| <b>Section 1. Materials .....</b>             | <b>3</b> |
| Section 2. Instruments.....                   | 3        |
| Section 3. Synthesis.....                     | 4        |
| Section 4. Photocatalytic Experiments.....    | 8        |
| Section 5. Characterization and analysis..... | 9        |
| References.....                               | 27       |

## Section 1. Materials

All chemicals were obtained from commercial sources without further purification. 5,5-Dimethyl-1-pyrroline N-oxide (DMPO, 98%) were purchased from Aladdin Industrial Inc. Ethylenediaminetetraacetic acid disodium salt (EDTA- $\text{Na}^+$ , 99%), benzoquinone (AR), sodium azide ( $\text{NaN}_3$ , AR) were purchased from Macklin Inc. *N*-Butyllithium (99%) was purchased from J&K Ltd.

## Section 2. Instruments

$^1\text{H}$  and  $^{13}\text{C}$  spectra were obtained by using Bruker AVANCE-400 NMR spectrometer. Powder X-ray diffraction (PXRD) data were collected using a PANalytical B. V. Empyrean by depositing powder on a glass substrate. The nitrogen adsorption and desorption isotherms were performed at 77 K with a Micromeritics ASAP 2020M system. Surface areas were calculated using Langmuir and Brunauer–Emmett–Teller (BET) methods, respectively. The pore-size-distribution curves were calculated from nitrogen adsorption isotherms using nonlocal density functional theory (NLDFT). Scanning electron microscopy (SEM) images were obtained on a Hitachi SU8000 microscope. Transmission electron microscopy (TEM) images were obtained with a Tecnai G2 S–Twin F20 field-emission transmission electron microscope.  $^{13}\text{C}$  CP-MAS NMR measurements were carried out using a Bruker Avance III 400WB spectrometer at a MAS rate of 5 kHz and a CP contact time of 2 ms. FT–IR spectra analyses were performed using a Brucker IFS66 V spectrometer from 400 to 4000  $\text{cm}^{-1}$  by using KBr pellets. Solid-state UV/Vis absorption spectroscopy was analyzed using a Shimadzu U–4100 UV–Vis–NIR spectrophotometer. X-ray photoelectron spectroscopy (XPS) and XPS valance band analyses were carried out on a Thermo ESCALAB 250 XPS spectrometer. Photoluminescence, fluorescence quantum yield and luminescence lifetime were performed with a FLS920 spectrophotometer. Thermogravimetric analysis (TGA) was performed on a TA–Q500 thermogravimeter by measuring the weight loss under nitrogen. Electron paramagnetic resonance (EPR) spectra were recorded on JEOL JES–FA200 EPR spectrometer.

## Section 3. Synthesis

### 1. Synthesis of TFPT<sup>[1]</sup>

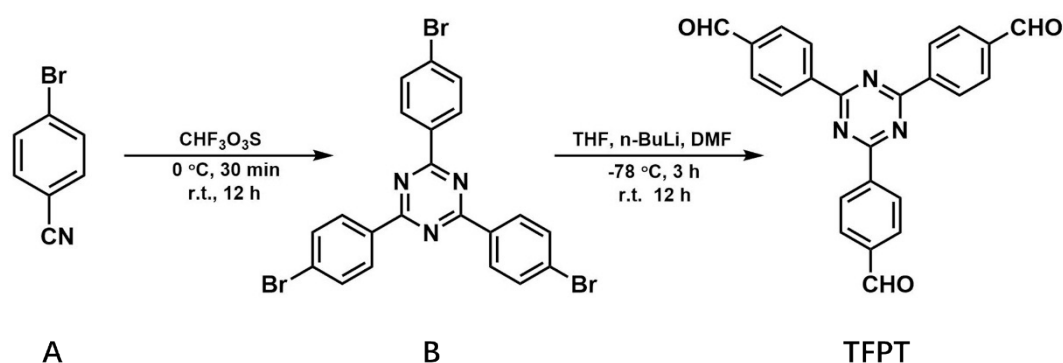

#### a) Synthesis of B

3.54 mL (6 g, 40 mmol) trifluoromethanesulfonic acid was slowly added to 4 g (22 mmol) of **A** at  $0\text{ }^\circ\text{C}$  and stirred for 30 min. It was further stirred at room temperature overnight. The resulting mixture was washed with 100 mL of deionized water and filtered under vacuum. Purification of the product afforded 3.95 g of white solid in a yield of 99%.

#### b) Synthesis of TFPT

1.46 g **B** (3 mmol) was dissolved in dry THF (250 mL) under a  $\text{N}_2$  atmosphere. 12 mL  $n\text{-BuLi}$  (30 mmol) was added dropwise in the stirred solution at  $-78\text{ }^\circ\text{C}$ . After stirring for 3 h, DMF (5 mL) was added to the obtained red solution at  $-78\text{ }^\circ\text{C}$  and the reaction mixture was further stirred for 12 h at room temperature. The mixture was acidified with 3 M HCl aqueous solution (50 mL). The organic volatiles were partially removed by evaporation under reduced pressure, and the product was extracted with  $\text{CHCl}_3$ . The organic layer was washed with brine, dried over  $\text{NaSO}_4$ , and concentrated in vacuo. Recrystallization of the mixture in the mixed petroleum ether and  $\text{CH}_2\text{Cl}_2$  to afford TFPT as white solid with a yield of 56%.

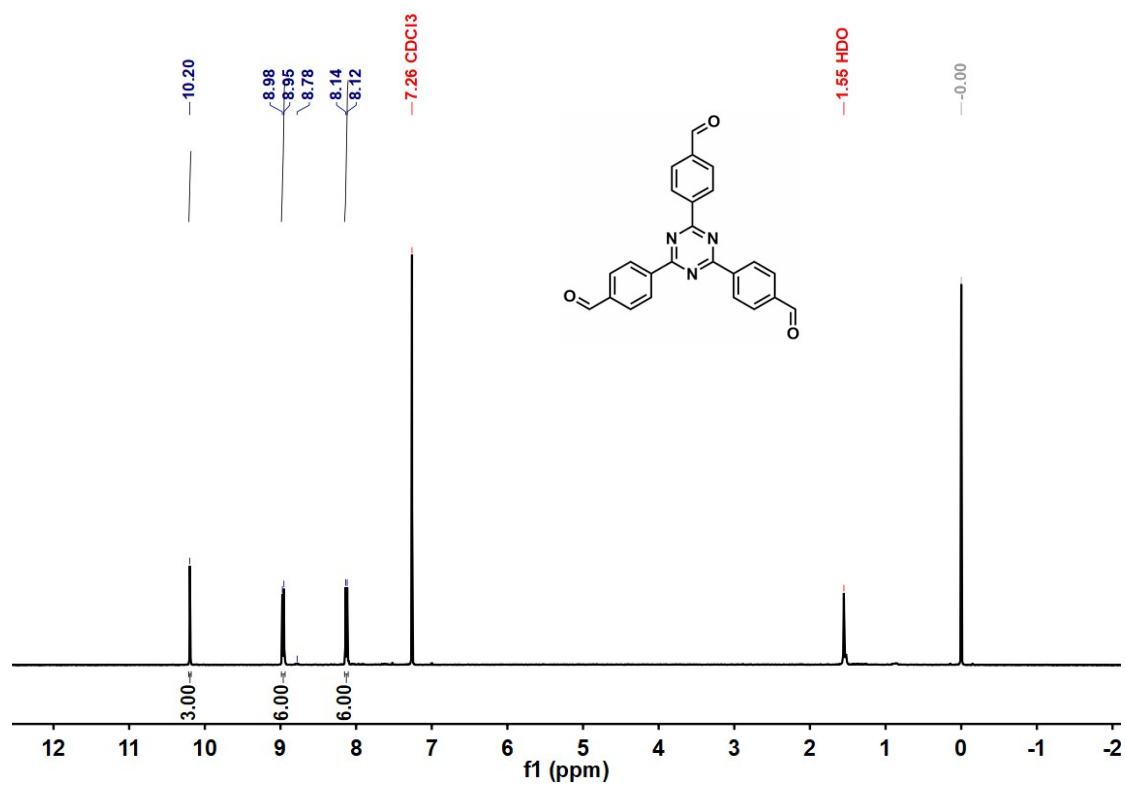

**Figure S1.**  $^1\text{H}$  NMR spectrum of TFPT.

## 2. Synthesis of BMTH<sup>[2]</sup>

### a) Synthesis of D

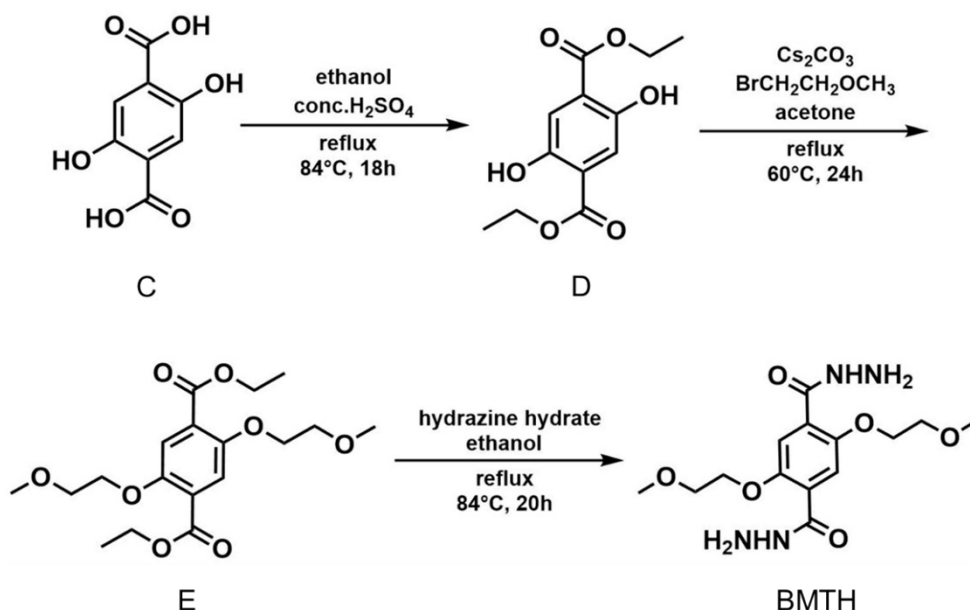

A solution of **C** (3 g, 15.2 mmol) in ethanol (60 mL) was added carefully to conc.  $\text{H}_2\text{SO}_4$  (12 mL) and reflux at  $84^\circ\text{C}$  for 18 h. The mixture was filtered and washed with iced water. The product was dried, and collected with a yield of 97%.

### b) Synthesis of E

**D** (1.20 g, 4.76 mmol),  $\text{Cs}_2\text{CO}_3$  (10.41 g, 31.90 mmol) and 2-bromoethyl methyl ether (1.39 g, 10.00 mmol) were suspended in acetone (42 mL). The mixture was refluxed at  $60^\circ\text{C}$  until starting material disappear (monitored by TLC). The mixture was filtered and the solvent evaporated. The residue was dissolved in  $\text{CH}_2\text{Cl}_2$ , washed with water and then dried over  $\text{Na}_2\text{SO}_4$ . The solvent was removed under reduced pressure, giving crude product. The crude product was purified by column chromatography (petroleum ether/ethyl acetate, v/v=6:1) to obtain target product as a white solid with a yield of 54%.

### c) Synthesis of BMTH

**E** (0.85 mg, 2.3 mmol), hydrazine hydrate (21.6 mL, 61.9 mmol) and ethanol (36 mL, 48.4 mmol) were added in a flask and reflux at  $84^\circ\text{C}$  for 20 h. The mixture was cooled to  $-15^\circ\text{C}$ , and then the product was filtered and dried under reduced pressure to yield a white solid with a yield of 94%.

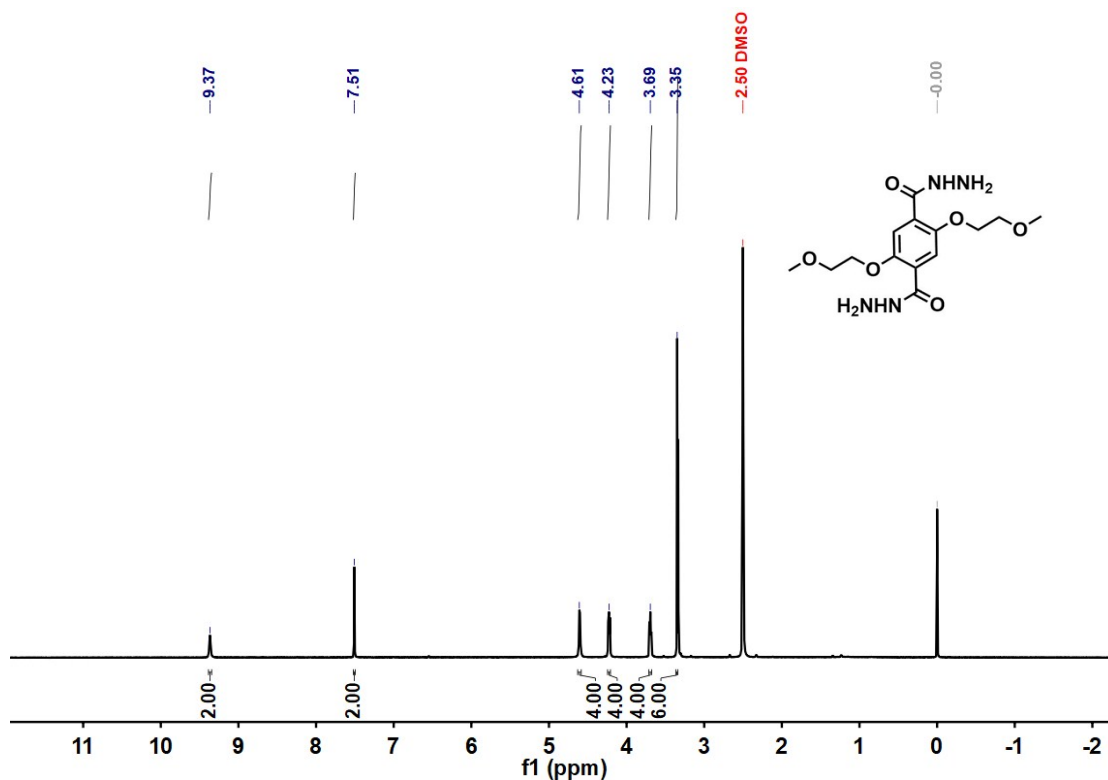

**Figure S2.**  $^1\text{H}$  NMR spectrum of **BMTH**.

### 3. Synthesis of TFPT-BMTH

A tube was charged with **TFPT** (30.1 mg), **BMTH** (23.1 mg), mesitylene (0.8 mL) and 1,4-dioxane (0.2 mL), and then immersed in ultrasonic bath for 2 min. The solution of 0.1 mL 6 M acetic acid was added to the tube. The tube was flash frozen at 77 K in liquid nitrogen and evacuated to the internal pressure of  $\sim 100$  mTorr, and then the tube was sealed. The reaction mixture was then placed to static oven and heated to  $120\text{ }^\circ\text{C}$  and kept for 3 days. After cooling down to room temperature, the resulting mixture was washed with THF (30 mL) and acetone (30 mL). After filtration, the product was dried at  $60\text{ }^\circ\text{C}$  under vacuum to give **TFPT-BMTH** as a fluffy yellow powder.

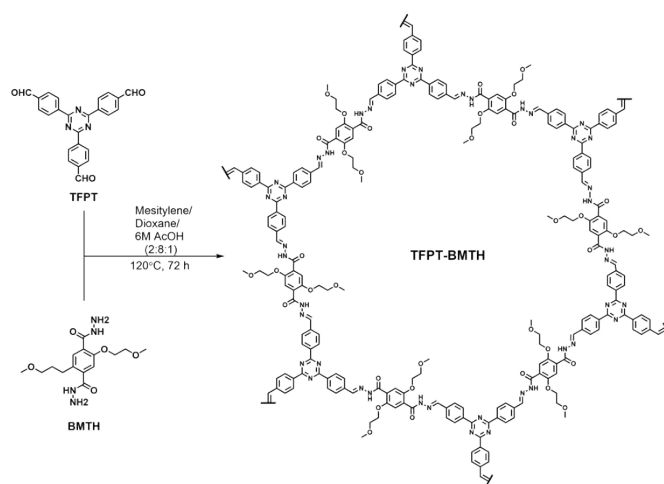

**Scheme S1** Synthesis of **TFPT-BMTH**

## Section 4. Photocatalytic Experiments

### General Procedure for the Photo-oxidative Coupling of Benzylamine and Derivatives

**TFPT-BMTH** (5 mmol%, 5.6 mg) was added to a glass vial with 0.2 mmol substrate dissolved in 5 mL H<sub>2</sub>O. Then the suspension was irradiated for 24 h at room temperature under a irradiation of blue LED lamp (30 W,  $\lambda=454$  nm). After removing the catalyst, the resulting mixture was analyzed by <sup>1</sup>H NMR spectroscopy using CDCl<sub>3</sub> as solvent.

## Section 5. Characterization and analysis

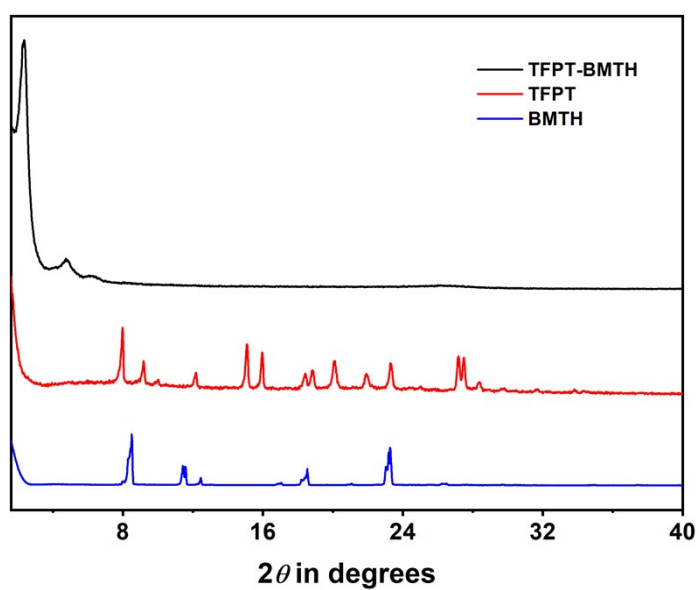

**Figure S3.** PXRD patterns of **TFPT-BMTH**, TFPT and BMTH.

**Figure S4.** BET surface area plot for **TFPT-BMTH**.

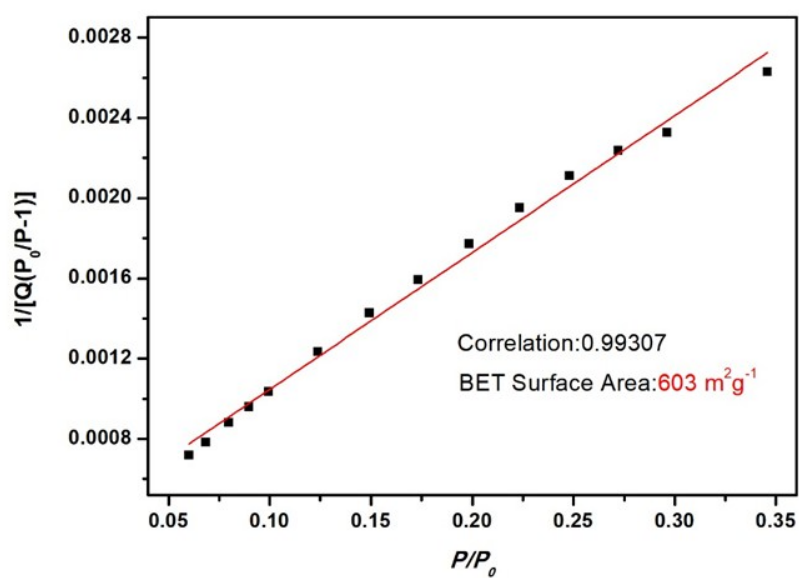

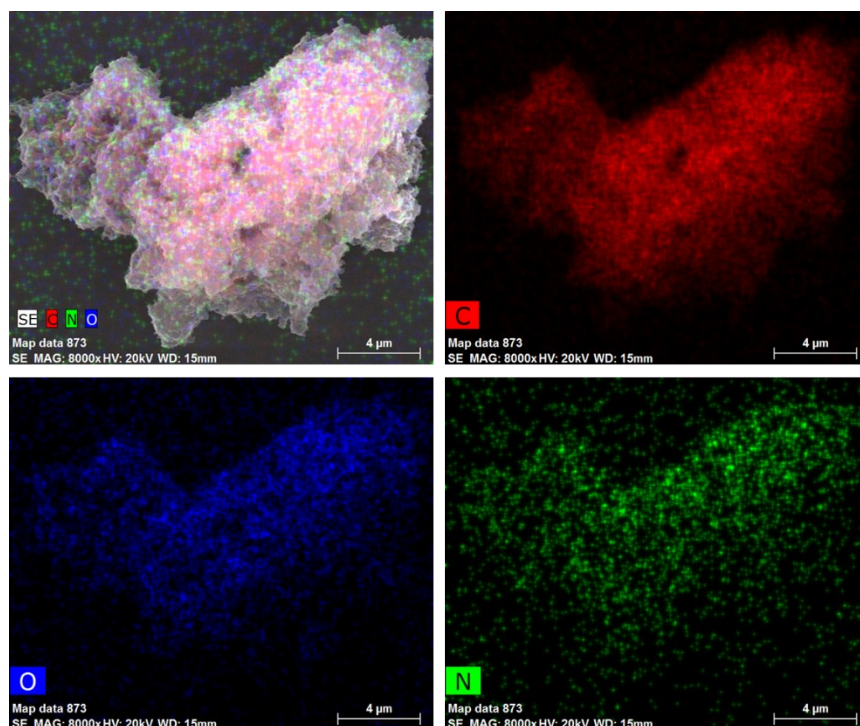

**Figure S5.** EDS images of **TFPT-BMTH**.

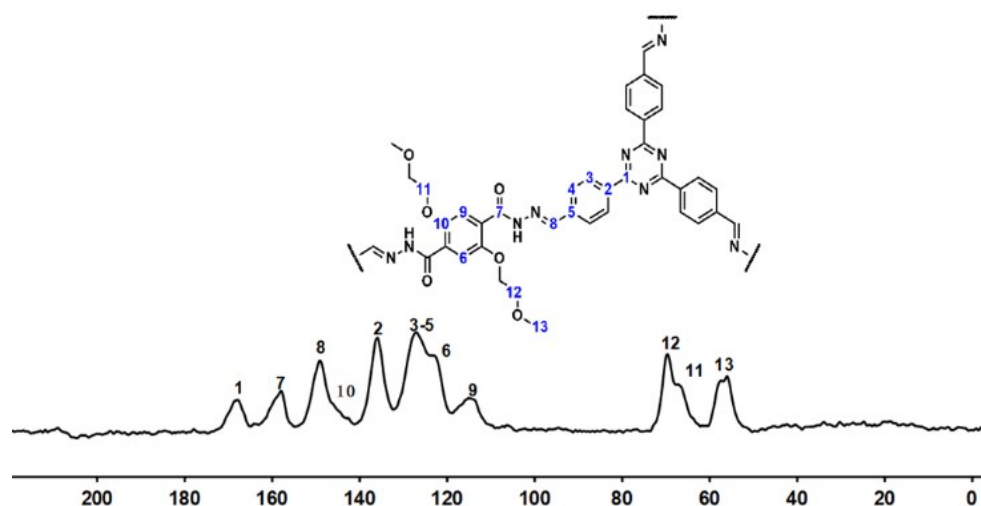

**Figure S6.**  $^{13}\text{C}$  CP-MAS NMR spectrum of **TFPT-BMTH**. The assignments of the signals are indicated in the chemical structure of **TFPT-BMTH**.

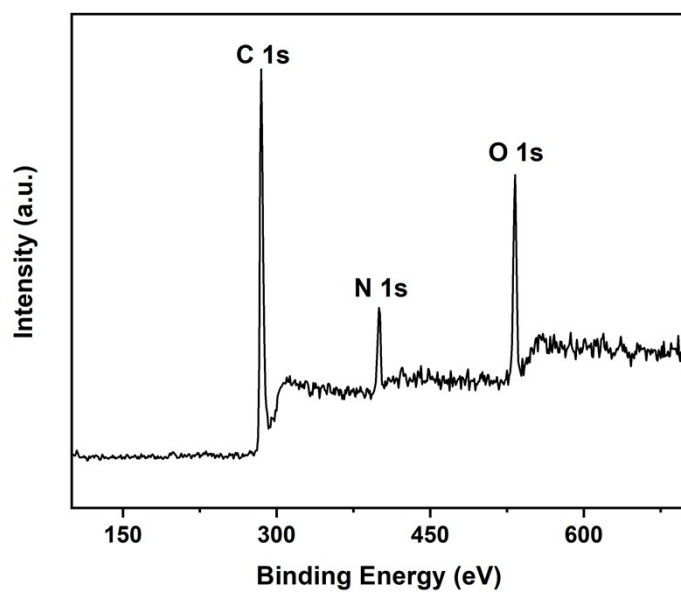

1s

**Figure S7.** Survey XPS spectrum of **TFPT-BMTH**.

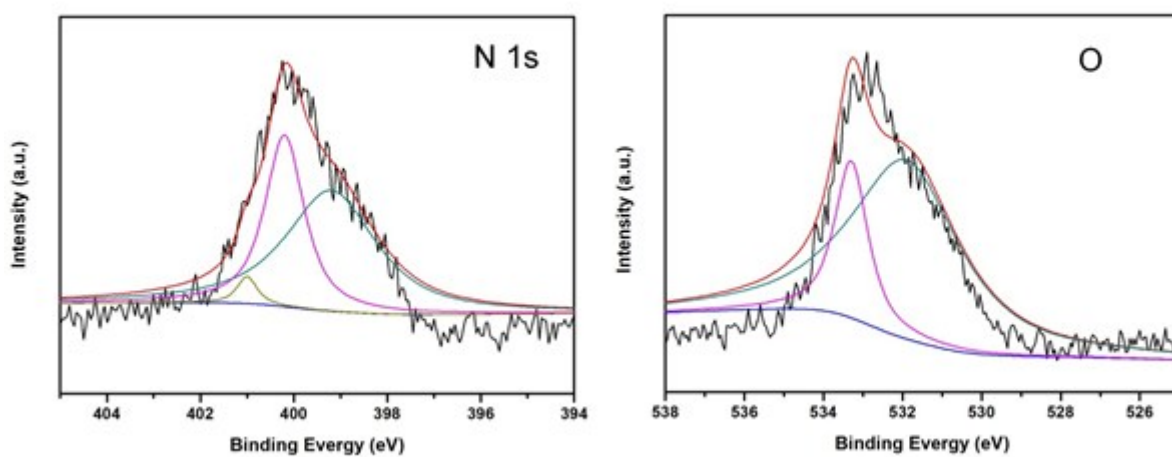

**Figure S8.** XPS spectra in the N 1s (left) region and O 1s (right) region of **TFPT-BMTH**.

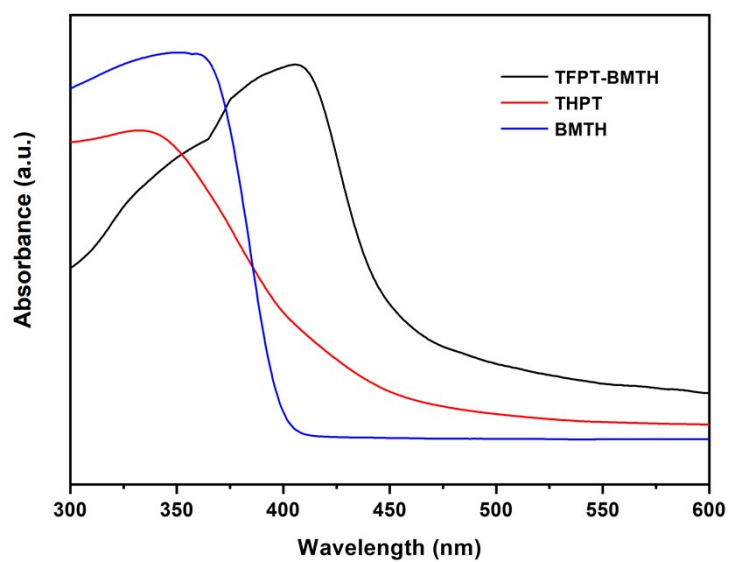

**Figure S9.** UV/Vis absorption spectra of **TFPT-BMTH**, **TFPT** and **BMTH**.

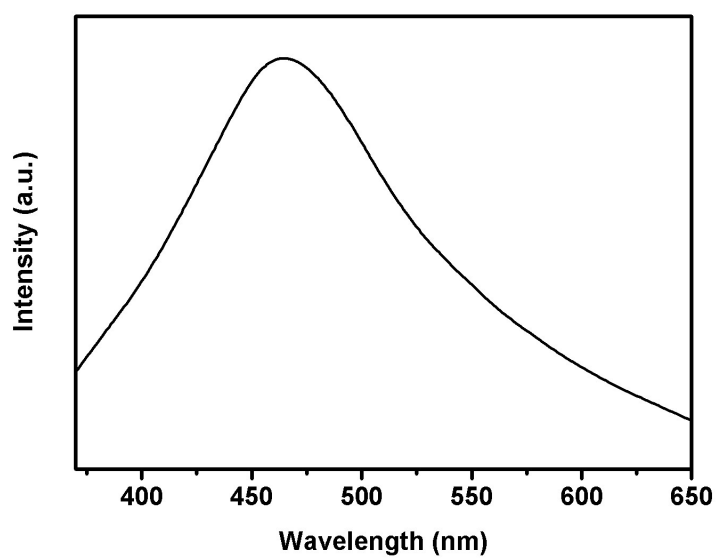

**Figure S10.** Fluorescence spectrum of **TFPT-BMTH**.

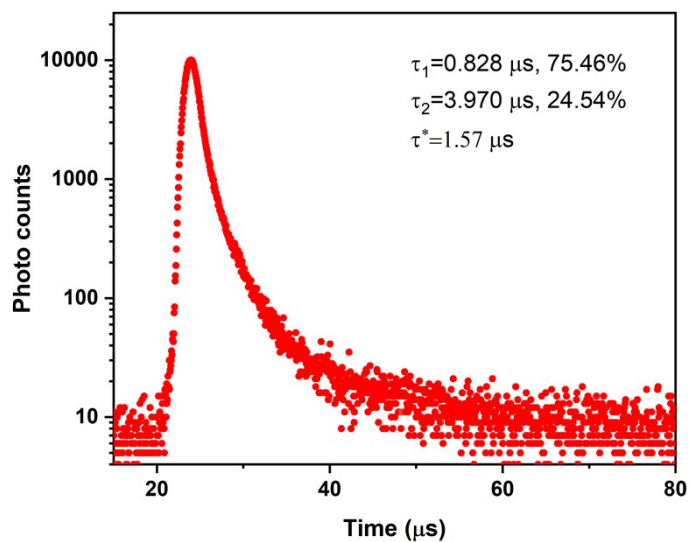

**Figure S11.** Luminescence lifetime for **TFPT-BMTH** dispersed in  $\text{H}_2\text{O}$  under air atmosphere. The luminescence lifetimes  $\tau_1$  and  $\tau_2$  are  $0.828 \mu\text{s}$  (75.46%) and  $3.970 \mu\text{s}$  (24.54%), the pre-exponential factors B1 and B2 are 9519.101 and 644.902, the average lifetime ( $\tau^*$ ) is  $1.57 \mu\text{s}$ . ( $\tau^*=75.46\% \tau_1 + 24.54\% \tau_2$ )

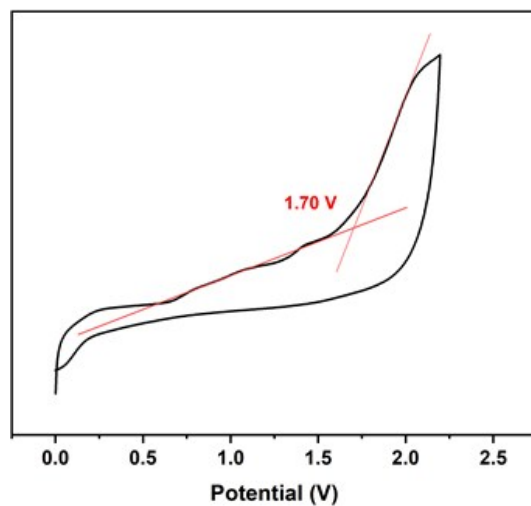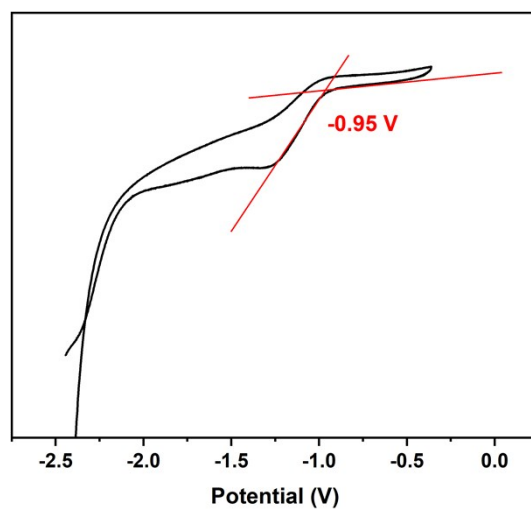

**Figure S12.** Cyclic voltammograms of **TFPT-BMTH**.

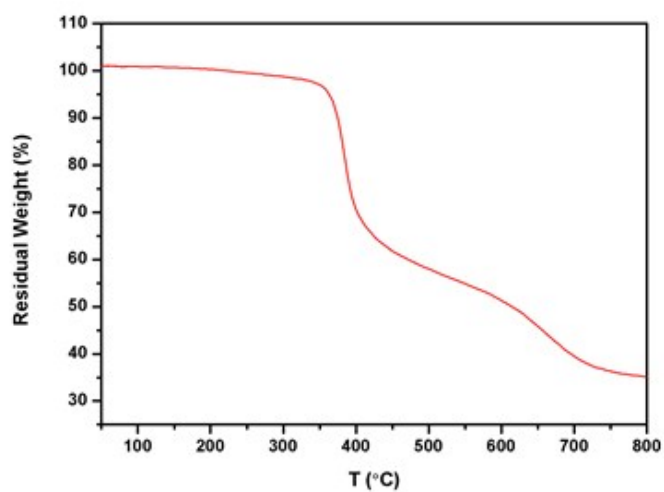

**Figure S13.** TGA curve of **TFPT-BMTH**.

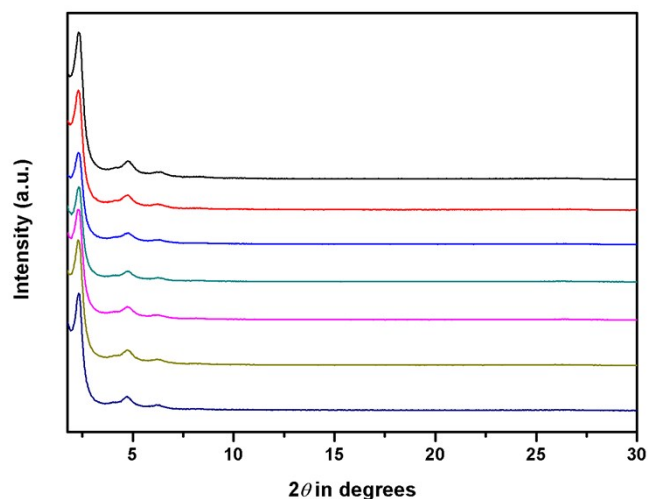

**Figure S14.** PXRD of **TFPT-BMTH** treated in different solvents. The same amount of **TFPT-BMTH** is immersed in different solvents for 12 hours at room temperature. Subsequently, the **TFPT-BMTH** was filtered and washed with a large amount of water and tetrahydrofuran, and finally dried for at 60 °C under vacuum for 3 hours. From top to bottom, THF, hexane, CHCl<sub>3</sub>, toluene, H<sub>2</sub>O (pH=1), H<sub>2</sub>O (pH=7), H<sub>2</sub>O (pH=13).

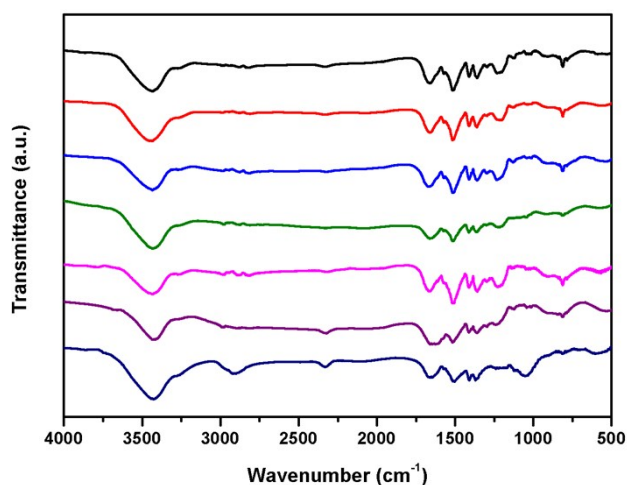

**Figure S15.** FT-IR spectra of **TFPT-BMTH** treated in different solvents. The same amount of **TFPT-BMTH** is immersed in different solvents for 12 hours at room temperature. Subsequently, the **TFPT-BMTH** was filtered and washed with a large amount of water and tetrahydrofuran, and finally dried for at 60 °C under vacuum for 3 hours. From top to bottom, THF, hexane, CHCl<sub>3</sub>, toluene, H<sub>2</sub>O (pH=1), H<sub>2</sub>O (pH=7), H<sub>2</sub>O (pH=13).

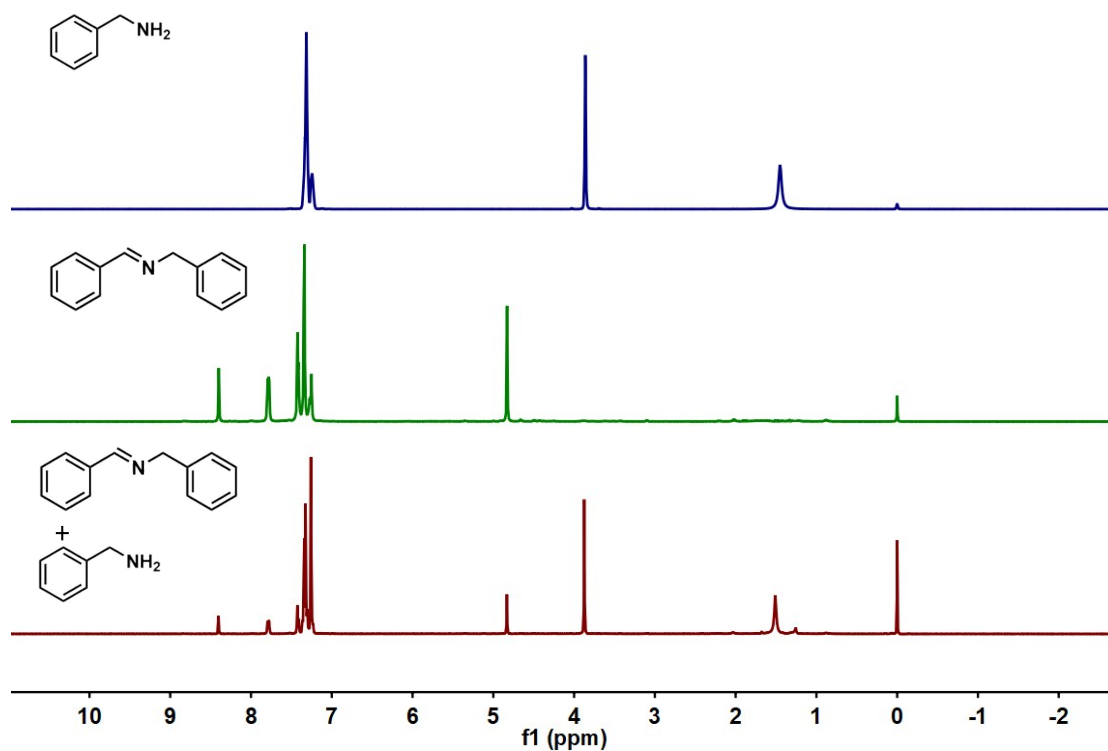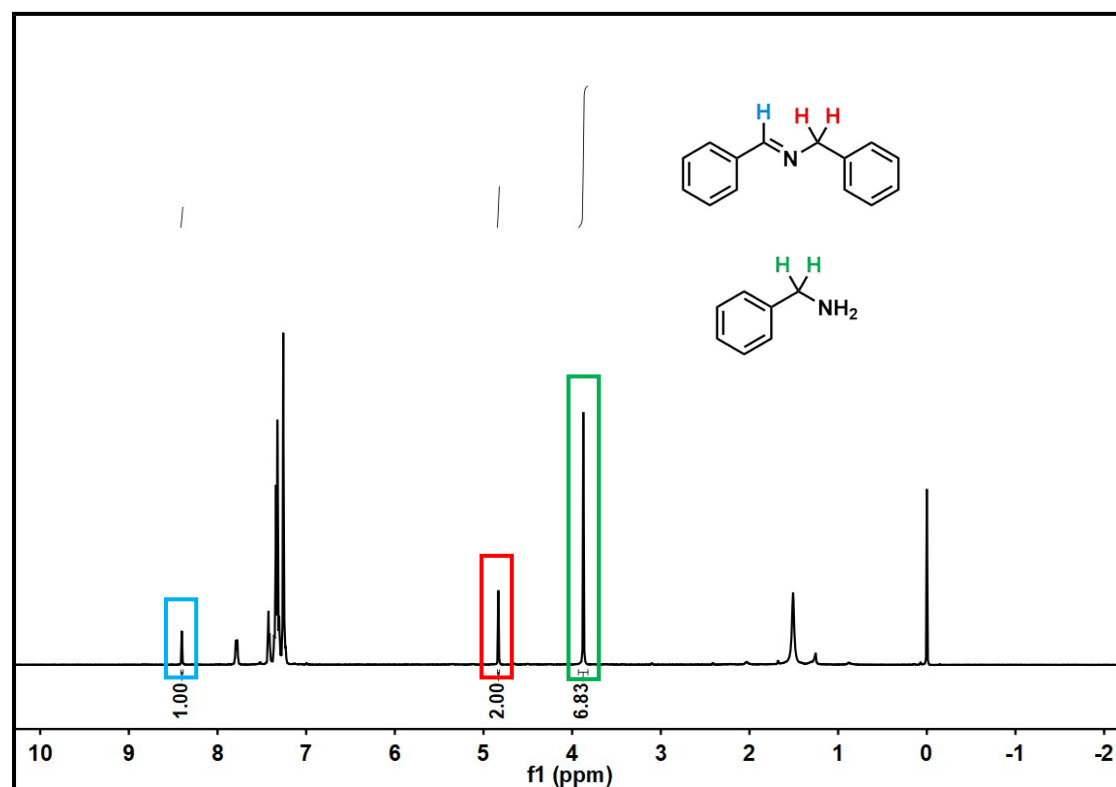

**Figure S16.**  $^1\text{H}$  NMR spectra of benzylamine, benzylimine and the mixture of the photo-oxidation of benzylamine (Table S10, entry 10). The conversion is 37%.

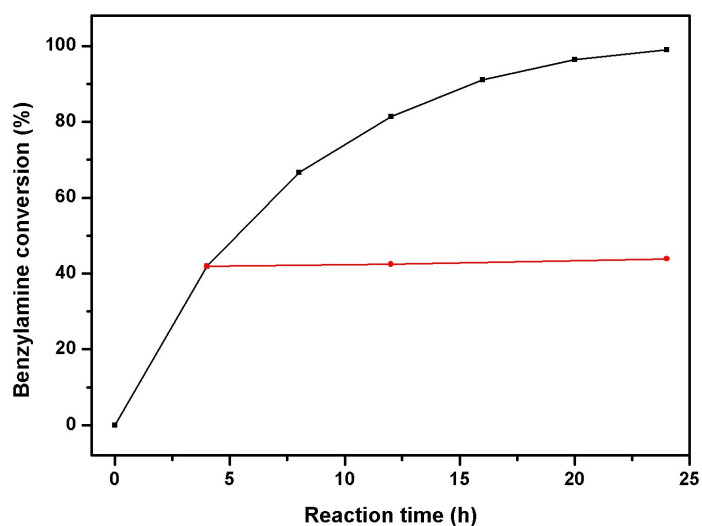

**Figure S17.** Kinetic profile for the photocatalytic oxidation of benzylamine (black line). After 4 hours, the **TFPT-BMTH** was filtered, and the filtrate was monitored for further reaction (red line).

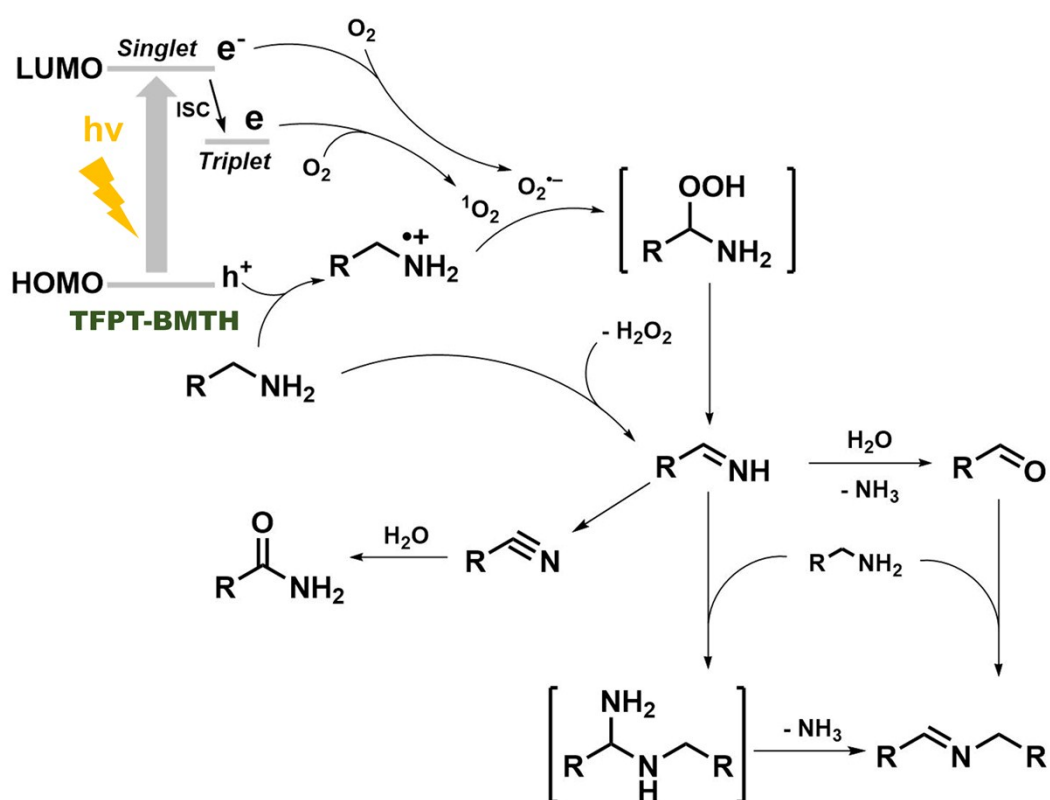

**Figure S18.** Proposed reaction mechanism of the photocatalytic oxidative coupling of benzylamine.

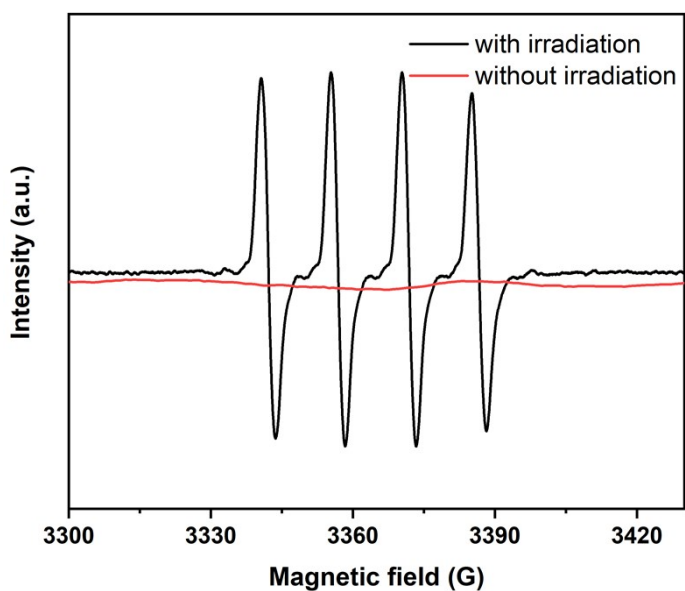

**Figure S19.** EPR spectra of DMPO- $O_2^{\bullet-}$ . Room temperature EPR spectra of a solution of **TFPT-BMTH** in air-saturated  $H_2O$  ( $1.12 \text{ mg mL}^{-1}$ ) in the presence of DMPO ( $0.02 \text{ M}$ ) with irradiation for 10 min (black line) and without irradiation (red line).

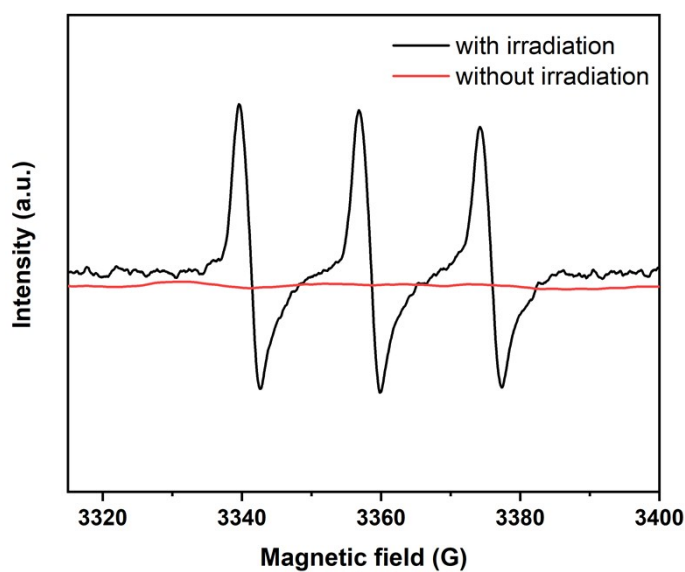

**Figure S20.** EPR spectra of TEMPO- $^1O_2$ . Room temperature EPR spectra of a solution of **TFPT-BMTH** in air-saturated  $H_2O$  ( $1.12 \text{ mg mL}^{-1}$ ) in the presence of TEMPO ( $0.02 \text{ M}$ ) with irradiation for 10 min (black line) and without irradiation (red line).

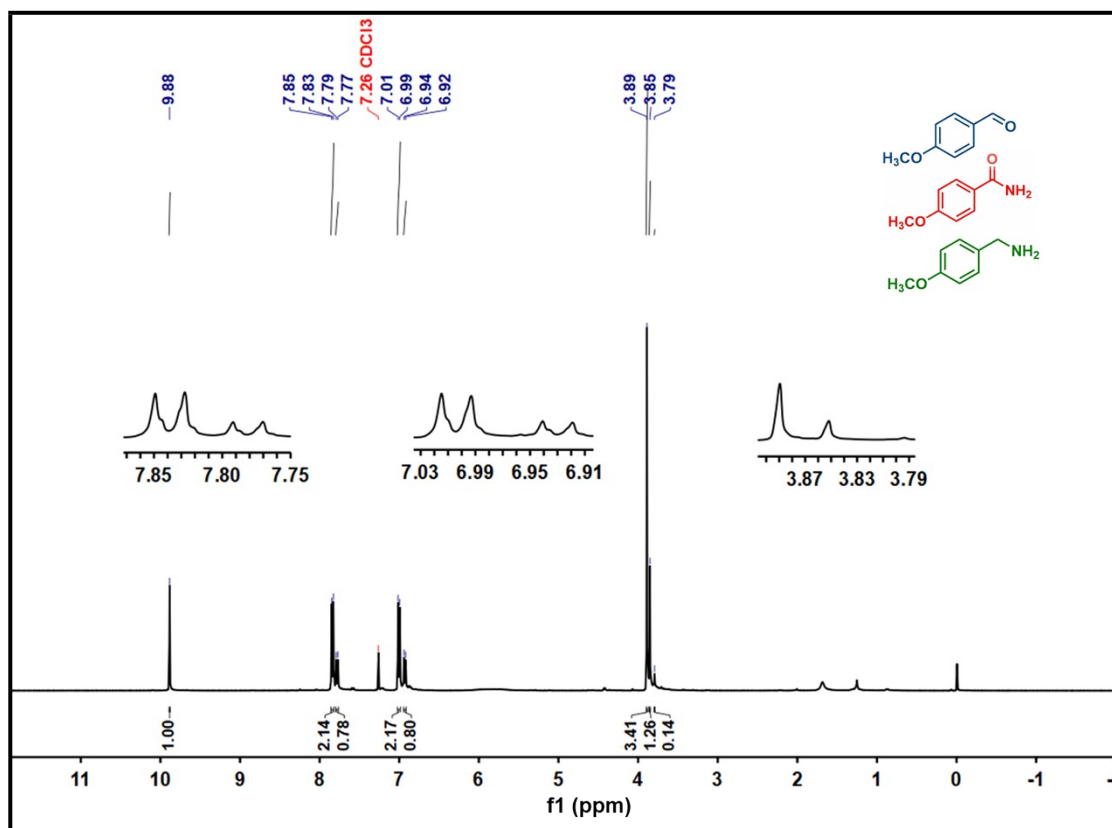

**Figure S21.**  $^1\text{H}$  NMR spectrum of the product obtained by photocatalytic oxidation of *p*-methoxybenzylamine. NOTE: blue peaks are assigned to *p*-methoxybenzaldehyde, red peaks are assigned to *p*-methoxybenzamide, green peak is associated to residual *p*-methoxybenzylamine.

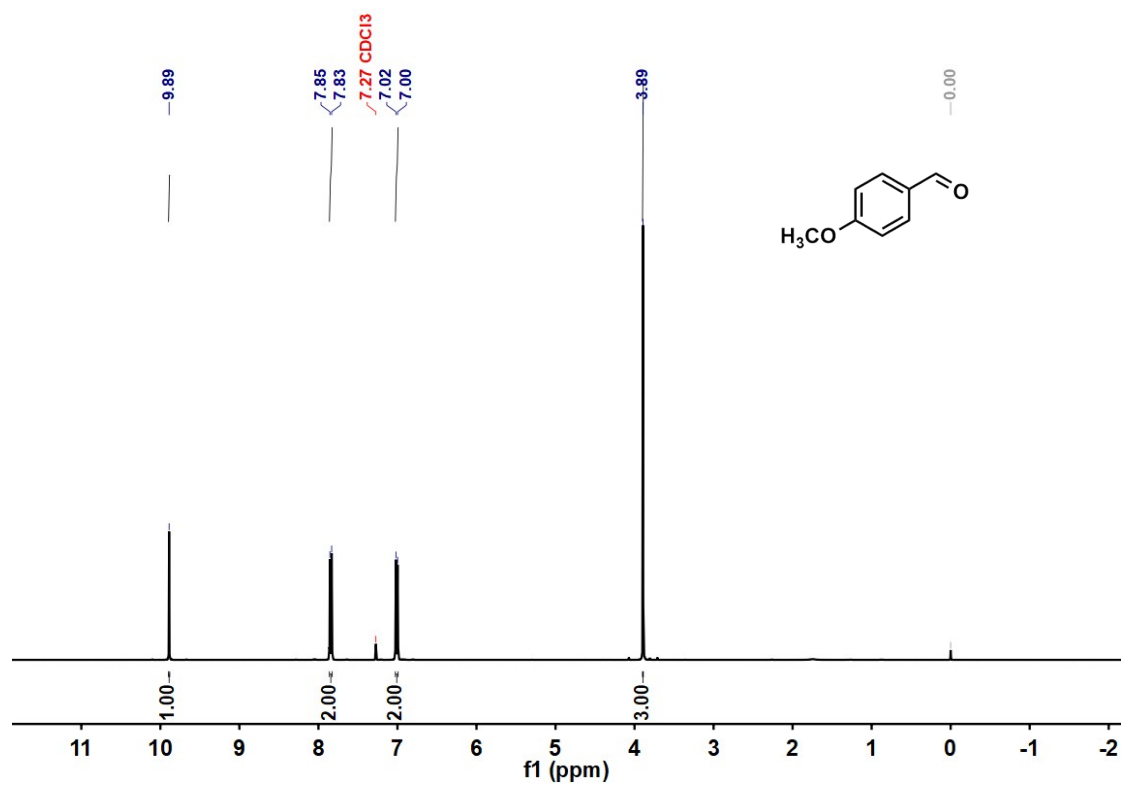

**Figure S22.** <sup>1</sup>H NMR spectrum of *p*-methoxybenzaldehyde obtained by column chromatography separation of the resulting mixture.

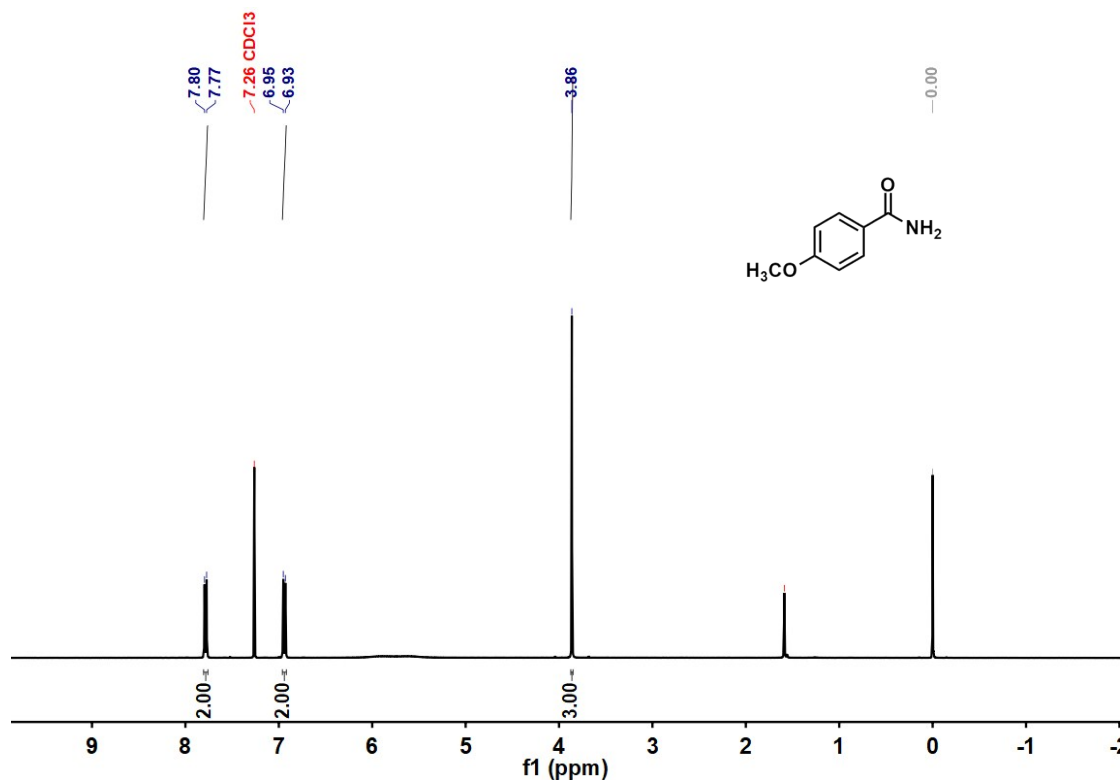

**Figure S23.** <sup>1</sup>H NMR spectrum of *p*-methoxybenzamide obtained by column chromatography separation of the resulting mixture.

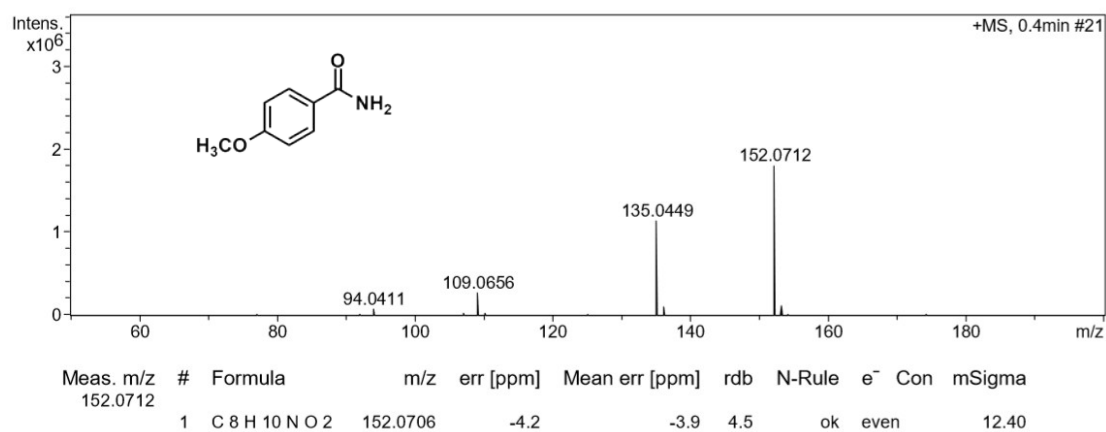

**Figure S24.** GC-MS spectrum of *p*-methoxybenzamide.

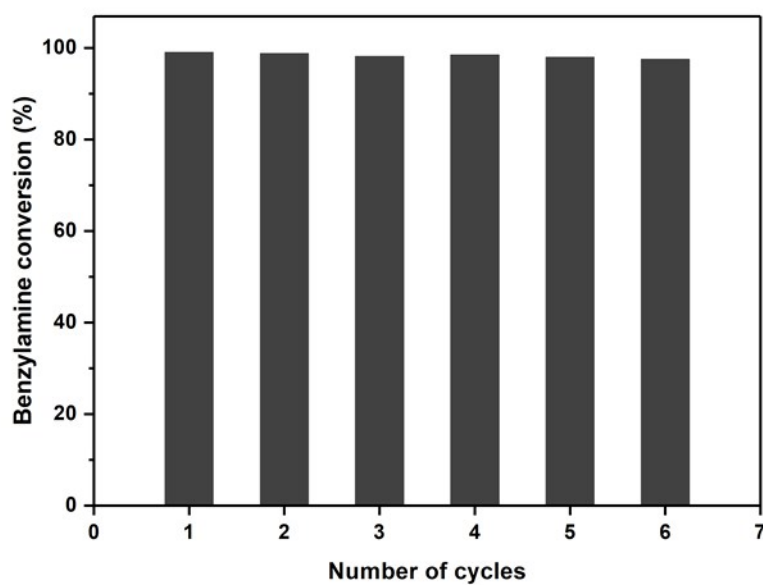

**Figure S25.** Reusability test for **TFPT-BMTH**. In each cycle, the **TFPT-BMTH** was recovered by filtration, washed, dried and reused in the next run of the reaction.

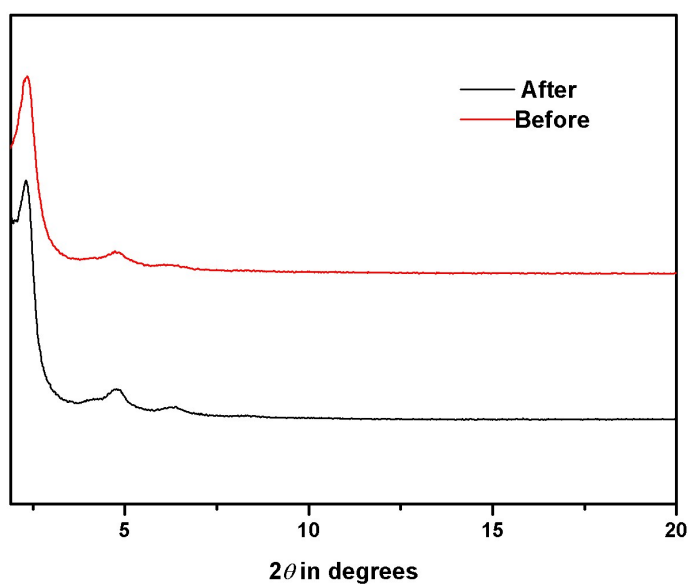

**Figure S26.** PXRD patterns of **TFPT-BMTH** before and after six cycles.

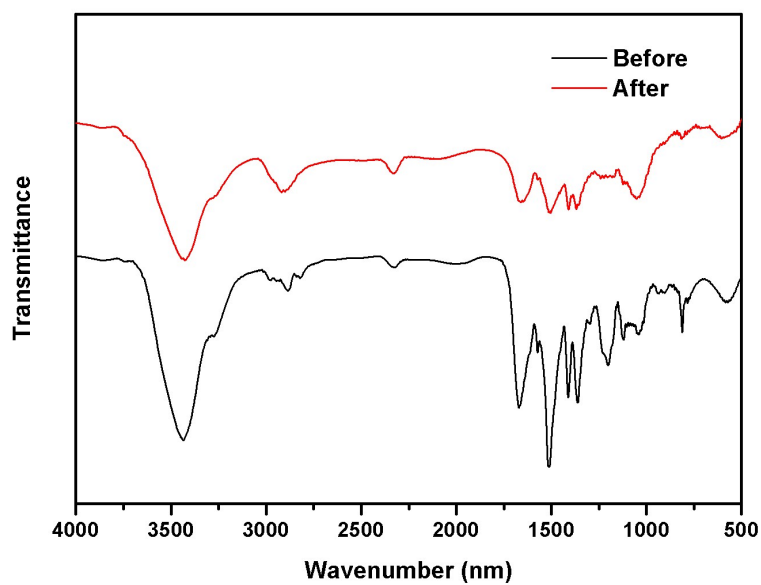

**Figure S27.** FT-IR spectra of **TFPT-BMTH** before and after six cycles.

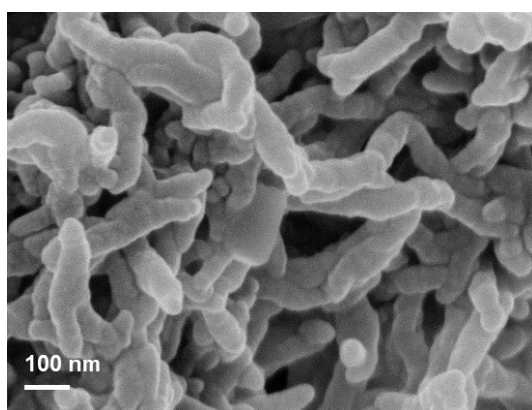

**Figure S28.** SEM image of **TFPT-BMTH** after six cycles.

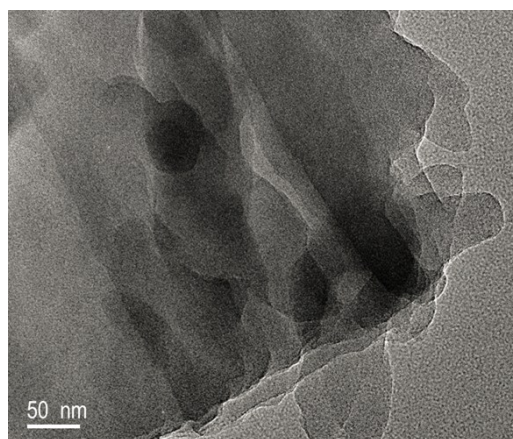

**Figure S29.** TEM image of **TFPT-BMTH** after six cycles.

**Table S1.** Oxidation of benzylamine catalyzed by **TFPT-BMTH**<sup>a</sup>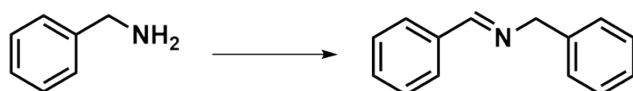

| Entry           | Cat.<br>(mmol%) | H <sub>2</sub> O<br>(mL) | Time<br>(h) | Light | Additive               | Conv. <sup>b</sup><br>(%) |
|-----------------|-----------------|--------------------------|-------------|-------|------------------------|---------------------------|
| 1               | 10              | 5                        | 24          | +     | -                      | 99                        |
| 2               | 5               | 5                        | 24          | +     | -                      | 99                        |
| 3               | 2               | 5                        | 24          | +     | -                      | 63                        |
| 4               | 5               | 5                        | 12          | +     | -                      | 84                        |
| 5               | 5               | 2                        | 24          | +     | -                      | 81                        |
| 6               | 0               | 5                        | 24          | +     | -                      | 7.5                       |
| 7               | 5               | 5                        | 24          | -     | -                      | trace                     |
| 8 <sup>c</sup>  | 5               | 5                        | 24          | +     | NaN <sub>3</sub>       | 86                        |
| 9 <sup>d</sup>  | 5               | 5                        | 24          | +     | Benzoquinone           | 54                        |
| 10 <sup>e</sup> | 5               | 5                        | 24          | +     | EDTA(Na <sup>+</sup> ) | 37                        |
| 11 <sup>f</sup> | 5               | 5                        | 24          | +     | 2-propanol             | 99                        |

<sup>a</sup>Reaction conditions: benzylamine (0.2mmol), RT, air atmosphere, blue LED lamp (30 W,  $\lambda=454$  nm). <sup>b</sup>

Determined by <sup>1</sup>H NMR spectroscopy. <sup>c</sup> NaN<sub>3</sub> as singlet oxygen scavenger. <sup>d</sup> Benzoquinone as superoxide radical scavenger. <sup>e</sup> EDTA(Na<sup>+</sup>) as hole scavenger. <sup>f</sup> 2-propanol as HO• scavenger.

**Table S2.** Representative heterogeneous catalysts for the oxidative coupling of benzylamines.

| Catalyst                                    | Solvent            | Light source   | Gas atmosphere | Time /h | Conv. <sup>a</sup> | Reference                                               |
|---------------------------------------------|--------------------|----------------|----------------|---------|--------------------|---------------------------------------------------------|
| B-BO-1,3,5                                  | CH <sub>3</sub> CN | 23W blue LED   | O <sub>2</sub> | 24      | 99%                | <i>Adv. Mater.</i> 2015, <b>27</b> , 6265-6270          |
| CF-HCP                                      | CH <sub>3</sub> CN | 30W green LED  | O <sub>2</sub> | 6       | 91%                | <i>J. Mater. Chem. A</i> , 2017, <b>5</b> , 8697-8704   |
| Tx-CMP                                      | CH <sub>3</sub> CN | Sunlight       | O <sub>2</sub> | 4       | 99%                | <i>ACS Catal.</i> 2012, <b>2</b> , 2630-2640            |
| SC-HM                                       | CH <sub>3</sub> CN | 50W Xe lamp    | O <sub>2</sub> | 4       | 99%                | <i>J. Am. Chem. Soc.</i> 2017, <b>139</b> , 2468-2473   |
| mpg-C <sub>3</sub> N <sub>4</sub>           | CH <sub>3</sub> CN | 300W Xe lamp   | O <sub>2</sub> | 3.5     | 99%                | <i>Angew. Chem. Int. Ed.</i> 2011, <b>50</b> , 657-660  |
| R-WO <sub>3</sub>                           | CH <sub>3</sub> CN | Sunlight       | O <sub>2</sub> | 2       | 38%*               | <i>J. Am. Chem. Soc.</i> 2016, <b>138</b> , 8928-8935   |
| MOF 6 (Ru(bpy) <sub>3</sub> <sup>2+</sup> ) | CH <sub>3</sub> CN | 300W Xe lamp   | O <sub>2</sub> | 1       | 83%                | <i>J. Am. Chem. Soc.</i> 2011, <b>133</b> , 13445-13454 |
| NH <sub>2</sub> -MIL125(Ti)                 | CH <sub>3</sub> CN | 300W Xe lamp   | O <sub>2</sub> | 12      | 73%**              | <i>Appl. Catal. B</i> 2015, <b>164</b> , 428-432        |
| PCN-222 (Zr)                                | CH <sub>3</sub> CN | 300W Xe lamp   | Air            | 1       | 100%*              | <i>Chem. Sci.</i> 2018, <b>9</b> , 3152-3158            |
| BiOBr-OV                                    | CH <sub>3</sub> CN | 420 nm Xe lamp | Air            | 12      | 96%                | <i>J. Am. Chem. Soc.</i> 2018, <b>140</b> , 1760-1766   |
| pTCP-2P                                     | CH <sub>3</sub> CN | 26W white CFL  | Air            | 6       | 98%                | <i>J. Mater. Chem. A</i> 2018, <b>6</b> , 15154-15161   |
| UNLPPF-12 (Zr) (Sn <sup>IV</sup> porphyrin) | CH <sub>3</sub> CN | 14 W CFL       | Air            | 2       | 99%                | <i>ACS Catal.</i> 2015, <b>5</b> , 5283-5291            |
| Zn-PDI                                      | CH <sub>3</sub> CN | 500W Xe lamp   | Air            | 4       | 74%                | <i>J. Am. Chem. Soc.</i> 2016, <b>138</b> , 3958-3961   |
| TFPT-BMTH                                   | H <sub>2</sub> O   | 30W blue LED   | Air            | 24      | 99%                | This work                                               |

<sup>a</sup>The conversion rates were determined by <sup>1</sup>H NMR analysis.

\*The conversion rates were determined by gas chromatography-mass spectrometry (GC-MS).

\*\*The conversion rate was determined by gas chromatography-flame Ionization detector (GC-FID).

## References

- [1] H. Tanaka, K. Shizu, H. Nakanotani, C. Adachi, *Chem. Mat.* **2013**, 25, 3766–3771.
- [2] S. Bartoli, G. De Nicola, S. Roelens, *J. Org. Chem.* **2003**, 68, 8149–8156.
